# Supplementary material for: A Comparative Analysis of Microbial Communities in the Rhizosphere Soil and Plant Roots of Healthy and Diseased Yuanyang Nanqi (Panax vietnamensis) with Root Rot
Source: MDPI journal article supplement (doi:10.3390/agriculture14050719), 2024-05-01
Supplement: s1 [file s1]

Supplemental Table S1. Primers used for PCR and DNA sequencing.

| Locus | Primer      |                       | Use |            | Reference              |
|-------|-------------|-----------------------|-----|------------|------------------------|
|       | Primer name | Sequence (5'-3')      | PCR | Sequencing |                        |
| ITS   | ITS1        | TCCGTAGGTGAACCTGCGG   | ●   | ●          | White et al. 1990      |
|       | ITS4        | TCCTCCGCTTATTGATATGC  | ●   | ●          | White et al. 1990      |
|       | EF 1        | ATGGGTAAGGARGACAAGAC  | ●   |            | O'Donnell et al. 1998b |
|       | EF 2        | GGARGTACCAGTSATCATG   | ●   |            | O'Donnell et al. 1998b |
| TEF1  | EF 3        | GTAAGGAGGASAAGACTCACC |     | ●          | O'Donnell et al. 2008a |
|       | EF 22T      | AGGAACCCTTACCGAGCTC   |     | ●          | O'Donnell et al. 1998b |
|       | EF 22U      | AGGAACCCTTRCCGAGCTC   |     | ●          | Zhou et al. 2018       |
|       | 5f2         | GGGGWGAYCAGAAGAAGGC   | ●   | ●          | O'Donnell et al. 2010b |
| RBP2  | 7cr         | CCCATRGCTTGYYTTRCCCAT | ●   | ●          | Liu et al. 1999        |
|       | 7cf         | ATGGGYAARCAAGCYATGGG  | ●   | ●          | Liu et al. 1999        |
|       | 11ar        | GCRTGGATCTTRTCRTCSACC | ●   | ●          | Liu et al. 1999        |

D = A/G/T; K = G/T; R = A/G; S = C/G; W = A/T; Y = C/T
