# Supplementary figures and images for: A Comparative Analysis of Microbial Communities in the Rhizosphere Soil and Plant Roots of Healthy and Diseased Yuanyang Nanqi (Panax vietnamensis) with Root Rot
Source: MDPI journal article supplement (doi:10.3390/agriculture14050719), 2024-05-01

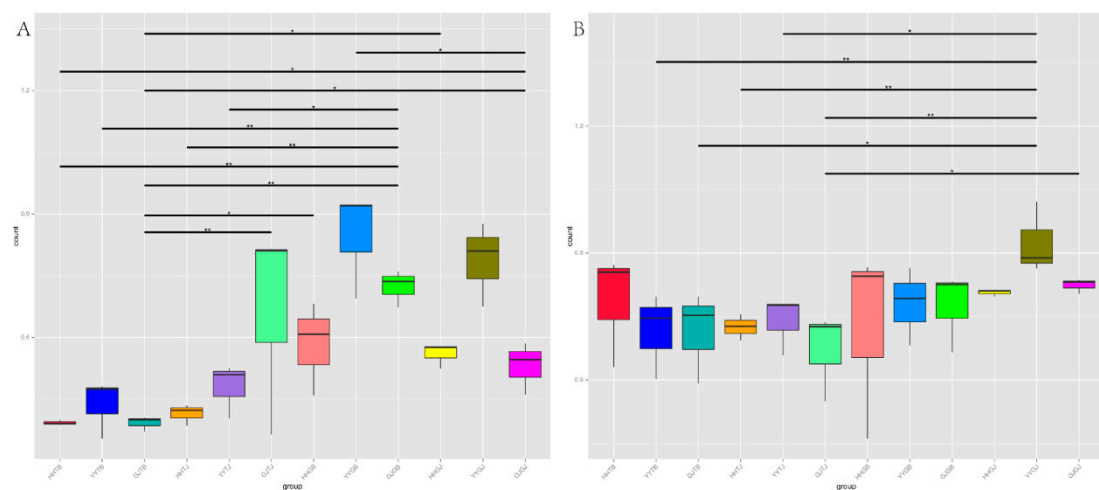

**Figure S1.** Bacteria and fungi  $\alpha$ -diversity Significance analysis.

Supplement: s1 [file s1]
